# Supplementary material for: Interactions between H-bonded [CuII3(μ3-OH)] triangles; a combined magnetic susceptibility and EPR study
Source: Royal Society of Chemistry journal article supplement (doi:10.1039/c8cp02643b), 2018-01-01
Supplement: c8cp02643b1.pdf [file c8cp02643b1.pdf]

## SUPPORTING INFORMATION

Interactions between H-bonded  $[\text{Cu}^{\text{II}}_3(\mu_3\text{-OH})]$  triangles; A combined magnetic susceptibility and EPR study.

Logesh Mathivathanan,<sup>a</sup> Athanassios K. Boudalis,<sup>a,b</sup> Philippe Turek,<sup>b</sup> Michael Pissas,<sup>c</sup> Yiannis Sanakis,<sup>c\*</sup> Raphael G. Raptis<sup>a\*</sup>

### Details for the simulation of the solide powder EPR spectra

In order to account for broadening effects we assume one nuclear spin per trimer with  $I_a = I_b = 3/2$  with a hyperfine interaction  $A_{||,i} = 280$  MHz. It was found that better agreement between theory and experiment can be achieved by allowing for a slight rotation of the  $\mathbf{g}_a$  and  $\mathbf{g}_b$  along the  $\mathbf{r}_{ab}$  vector to an angle  $\xi = 0.5^\circ$  and introducing an ordering of the molecules according to the orientation distribution [see reference 26]  $P(\theta) = \exp(-U(\theta))$  with  $U(\theta) = -\lambda(3 \cos 2\theta - 1)/2$ , where  $\theta$  is the angle between the molecular  $z$  axis and the static magnetic field. The ordering parameter was fixed to  $\lambda = -10$  (<http://www.easyspin.org/>). The simulation of the parallel mode X-band spectrum does not account for several resonances in the 250 - 500 mT range which are remnants from the allowed  $\Delta M_S = \pm 1$  transitions. The little difference of the obtained parameters at the two frequencies are attributed to instrumental conditions

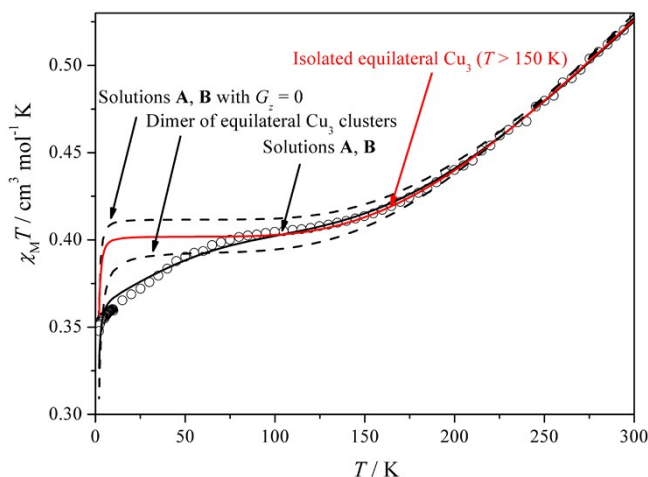

**Figure S1.**  $\chi_M T$  vs  $T$  experimental data and calculated curves for **1** according to the models described in the text. The solid black line represents fit according to solution **B**. In the dimer of equilateral  $\text{Cu}_3$  cluster model  $\chi_M T$  is considered per trimeric unit.

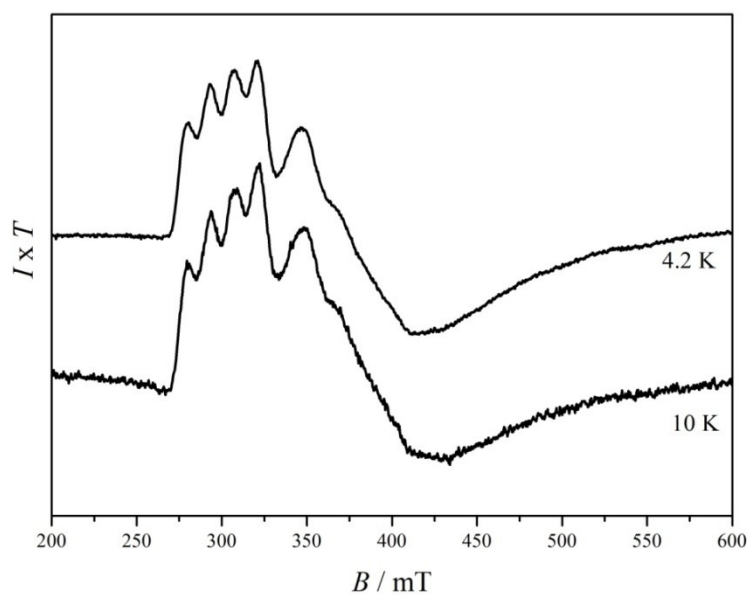

**Figure S2.** X-band EPR spectra of a frozen solution in THF of **1** at 4.2 and 10 K. The signals, scaled as  $I \times T$ , are super-imposable indicating that they arise from a ground state. EPR conditions: microwave frequency, 9.41 GHz; microwave power, 0.7  $\mu\text{W}$ ; modulation amplitude, 10  $G_{\text{pp}}$ .

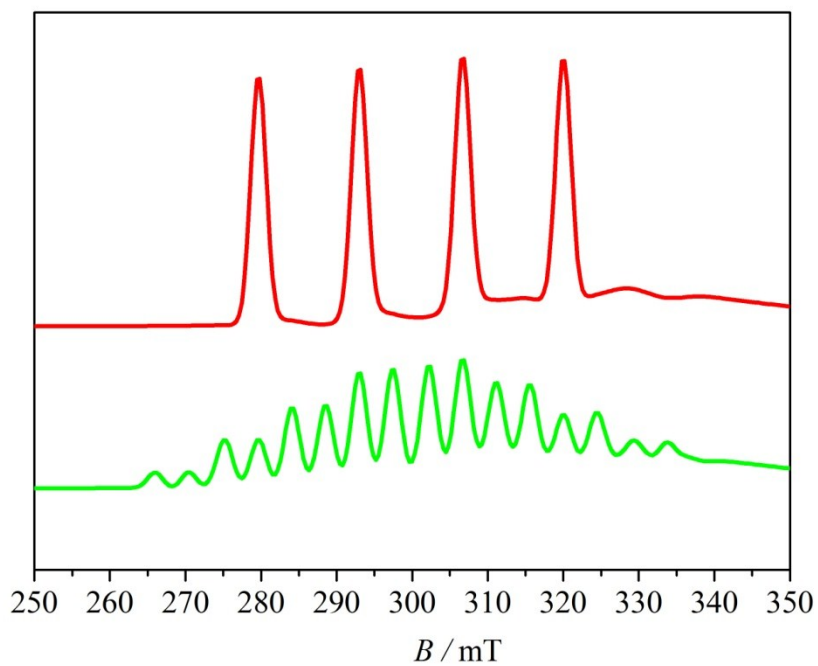

**Figure S3.** Hyperfine patterns from an axial  $S=1/2$  system in the  $g_{||}$  ( $>g_{\perp}$ ) region with three  $I=3/2$  nuclei according to model I ( $A_1 = -a/3$ ,  $A_2 = A_3 = +2a/3$ ; green line) and model II ( $A_1 = a$ ,  $A_2 = A_3 = 0$ ; red line).  $g_{||} = 2.25$ ;  $a_{||} = 425$  MHz. For the simulations an intrinsic line-width of  $\sigma_L = 0.8$  mT was assumed.

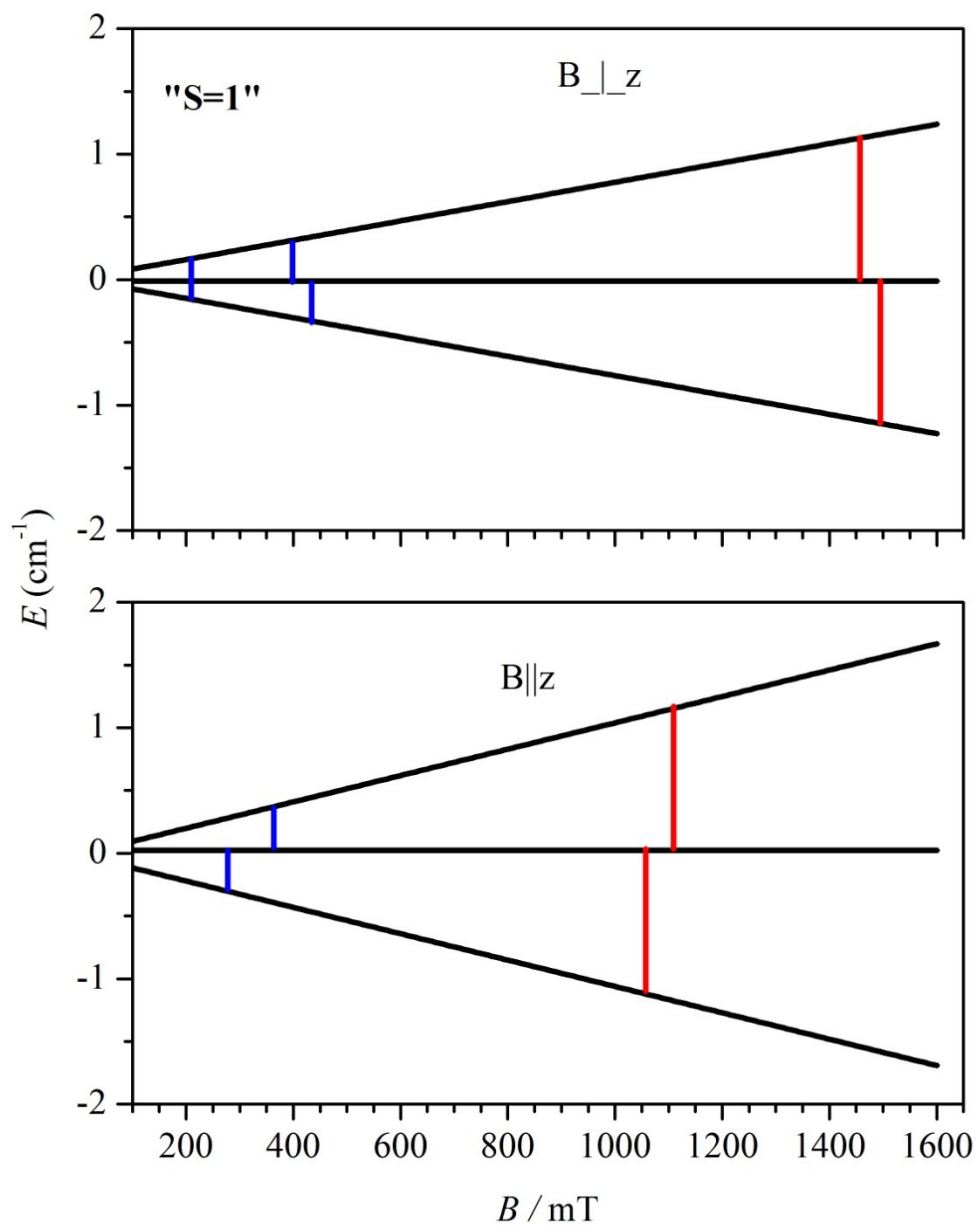

**Figure S4.** Dependence of the energy levels on the magnetic field for an effective  $S = 1$  system characterized by the spin Hamiltonian  $H_{zfs} = DS_z^2 + \beta \mathbf{B} \mathbf{g} \mathbf{S}$  for two orientations of the magnetic field relative to the z-axis of the  $\mathbf{D}$ -tensor.  $D = -0.033$   $\text{cm}^{-1}$ ,  $\mathbf{g} = [1.65, 1.65, 2.25]$ . The blue and red vertical bars indicate the EPR transitions at X- and Q-band respectively.

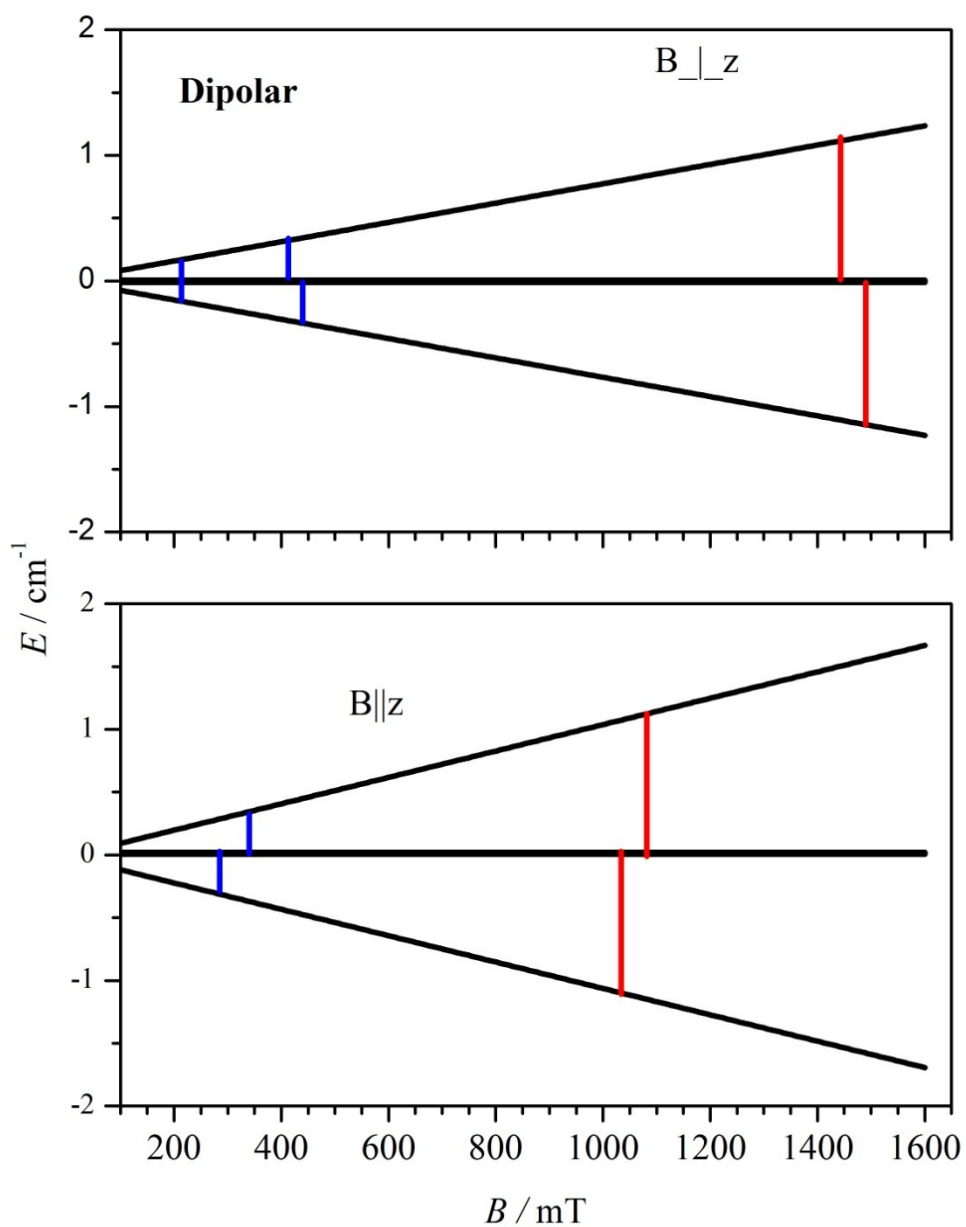

**Figure S5.** Dependence of the energy levels on the magnetic field for two spins with  $S_a = S_b = 1/2$  in the point dipolar approximation.  $\mathbf{g}_{a,b} = [1.65, 1.65, 2.25]$ ,  $r_{ab} = 4.4 \text{ \AA}$ . The two  $\mathbf{g}$ -tensors are assumed co-linear. The blue and red vertical bars indicate the EPR transitions at X- and Q-band respectively.
